# Supplementary material
Source: PubMed Central journal article supplement (PMC4970747)
Supplement: NIHMS712002-supplement-Supplemental.pdf [file NIHMS712002-supplement-Supplemental.pdf]

53BP1

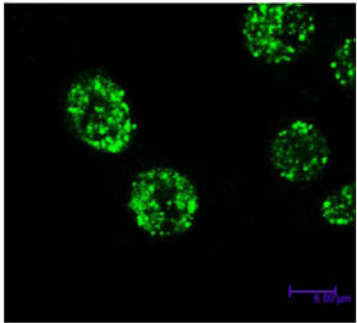

p-H2AX

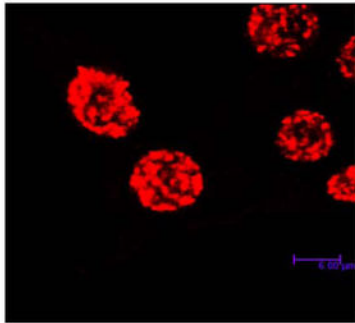

53BP1+ pH2AX

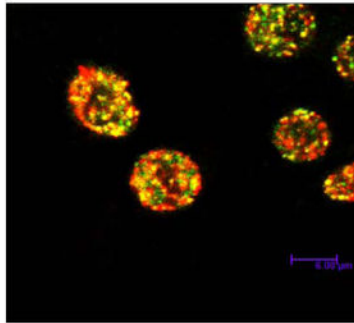

DAPI

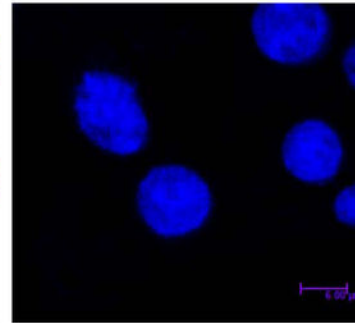

Suppl. 1

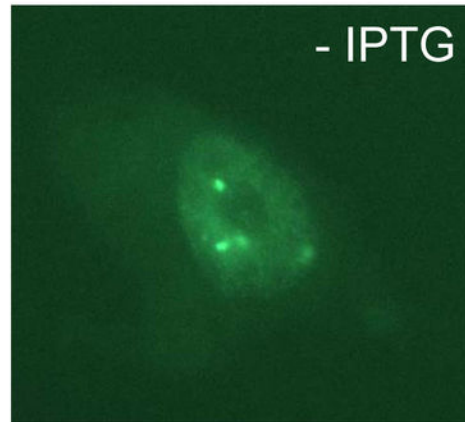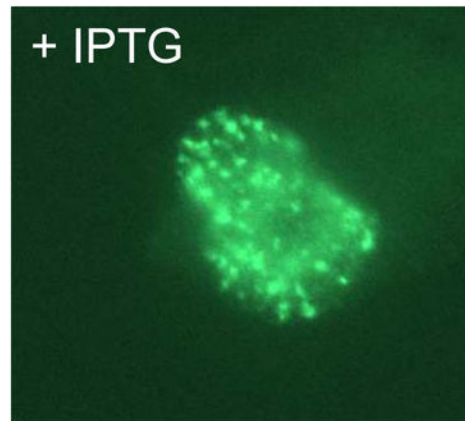

Suppl. 2

## **Supplementary figures**

### **Suppl. 1. Immunocytochemistry for H2AX and p-ATM in irradiated E1A+Ras cells.**

Representative images of E1A+Ha-ras cells stained for p-H2AX (Ser159) and p-ATM (Ser 1981) at various time points. Cells were irradiated and then fixed at 4, 24, 48 hr. Immunofluorescence of H2AX (red) and p-ATM (green), nuclei were stained with DAPI (blue).

**Suppl. 2. H2AX foci in HT-p21a cells.** HT-p21a cells were treated with were treated with IPTG or left untreated for 3 days. Immunofluorescence of H2AX (green).
